# Supplementary figures and images for: A series of lanthanide(iii) metal–organic frameworks derived from a pyridyl-dicarboxylate ligand: single-molecule magnet behaviour and luminescence properties
Source: Royal Society of Chemistry journal article supplement (doi:10.1039/d0dt02736g), 2020-01-01

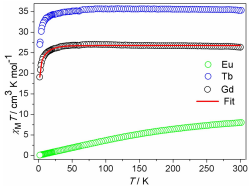

Supplement: d0dt02736g8.pdf [file d0dt02736g8.pdf]
